# Supplementary material
Source: Research Square preprint supplement (doi:10.21203/rs.3.rs-9612406/v1)
Supplement: Supplementary file 1 [file 8d08b9b09dbea4807be33bdf.docx]

Supplementary Table 1. Expected trough plasma levels of DOAC (ng/ml) with standard and lower/reduced doses based on literature (7, 13, 28-32).

|  | Apixaban | Dabigatran | Edoxaban | Rivaroxaban |
| --- | --- | --- | --- | --- |
| Standard dose | 103 (41-230) | 93 (40-215) | 27 (16-43) | 44 (12-137) |
| Lower/reduced dose | 79 (34-162) | 66 (28-155) | 21 (12-29) | 57 (18-136) |

Apixaban, Edoxaban, and Rivaroxaban: median (5th – 95th percentile).

Dabigatran: median (10th – 90th percentile).
